# Supplementary material
Source: Springer Nature journal article supplement (https://www.springermedizin.de/resource/supplementary/12933_2010_330_MOESM1_ESM.pdf/9538168)

**Number of patients**

50

40

30

20

10

0.00

50.00

100.00

150.00

**Gensini score**

Std. Dev=34.1

Mean=67.8

N = 344

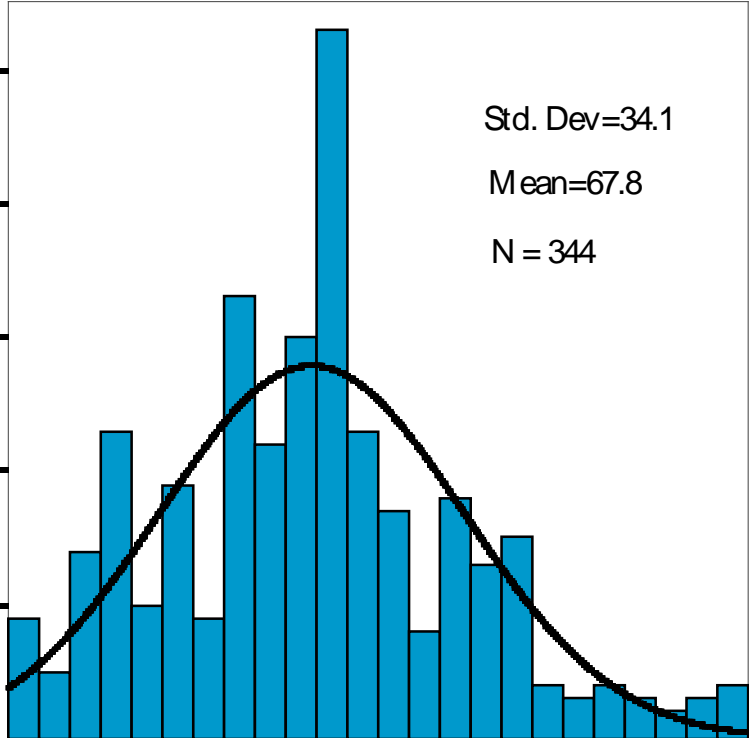

Supplement: MOESM1 [file 9538168]
